# Supplementary material
Source: Springer Nature journal article supplement (https://www.springermedizin.de/resource/supplementary/12890_2013_656_MOESM2_ESM.pdf/9505604)

Right nostril

Left nostril

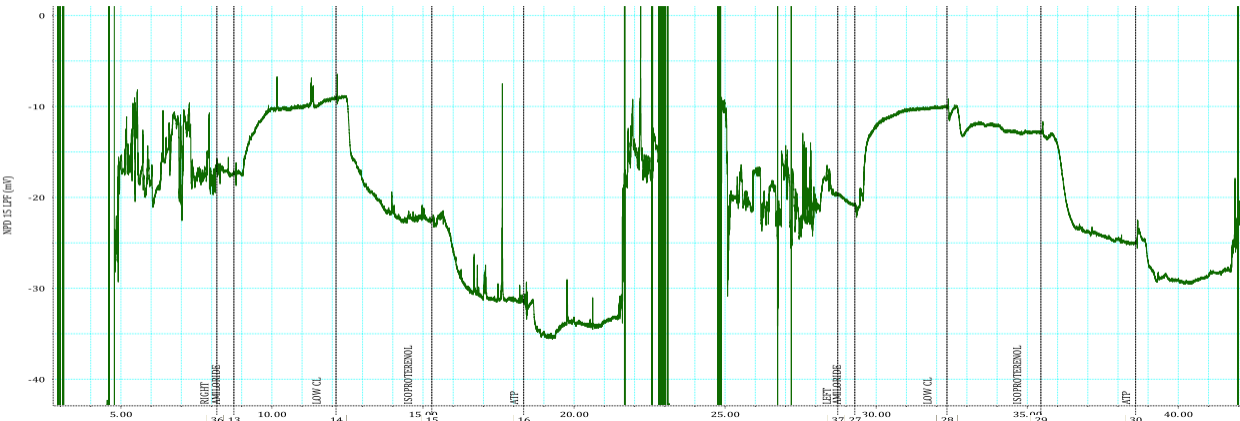

Supplement: MOESM2 [file 9505604]
